# Supplementary material for: Sclerostin blockade inhibits bone resorption through PDGF receptor signaling in osteoblast lineage cells
Source: JCI journal article supplement (doi:10.1172/jci.insight.176558), 2024-05-07

# Unedited blots for Figure 5E

|         |   |   |   |   |          |
|---------|---|---|---|---|----------|
| Scl-Ab  | - | - | - | + |          |
| SOST    | - | - | + | + |          |
| PDGF-BB | - | + | + | + | (15 min) |

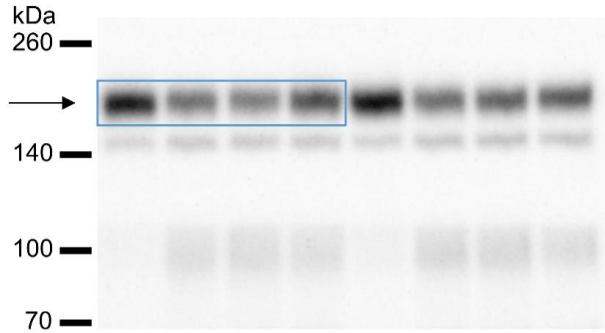

|         |   |   |   |   |          |
|---------|---|---|---|---|----------|
| Scl-Ab  | - | - | - | + |          |
| SOST    | - | - | + | + |          |
| PDGF-BB | - | + | + | + | (15 min) |

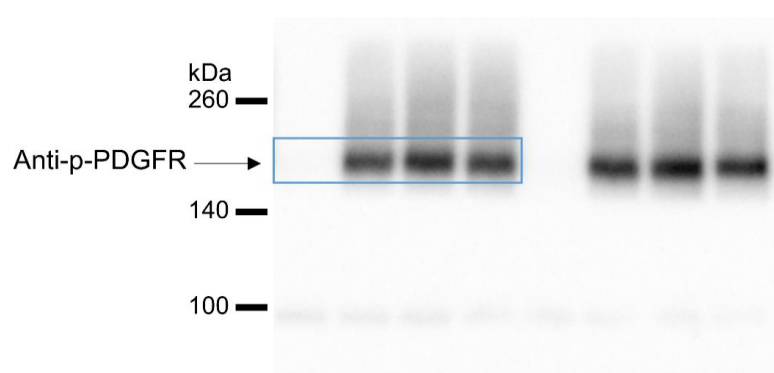

|         |   |   |   |   |          |
|---------|---|---|---|---|----------|
| Scl-Ab  | - | - | - | + |          |
| SOST    | - | - | + | + |          |
| PDGF-BB | - | + | + | + | (15 min) |

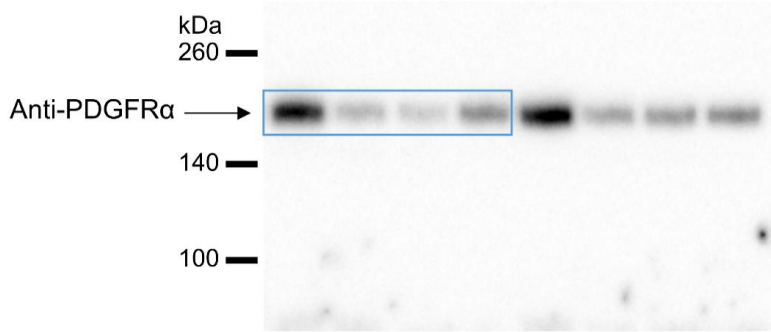

|         |   |   |   |   |          |
|---------|---|---|---|---|----------|
| Scl-Ab  | - | - | - | + |          |
| SOST    | - | - | + | + |          |
| PDGF-BB | - | + | + | + | (15 min) |

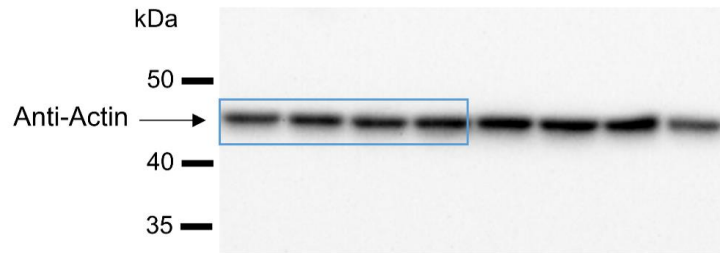

|         |   |   |   |   |            |
|---------|---|---|---|---|------------|
| Scl-Ab  | - | - | - | + |            |
| SOST    | - | - | + | + |            |
| PDGF-BB | - | + | + | + | (24 hours) |

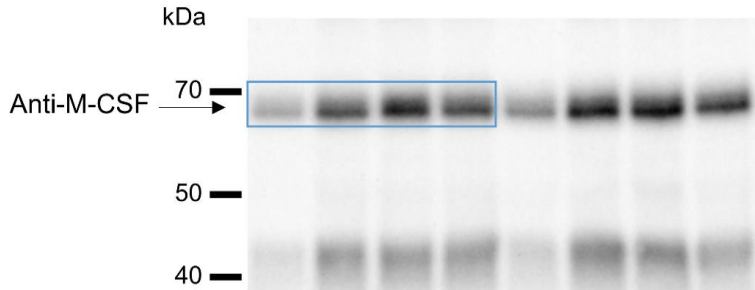

|         |   |   |   |   |            |
|---------|---|---|---|---|------------|
| Scl-Ab  | - | - | - | + |            |
| SOST    | - | - | + | + |            |
| PDGF-BB | - | + | + | + | (24 hours) |

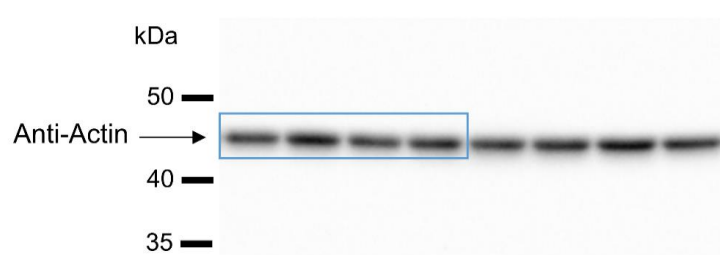

# Unedited blots for Figure 5F

IP : LRP6

|         |   |   |   |   |   |   |   |   |     |
|---------|---|---|---|---|---|---|---|---|-----|
| SOST    | - | + | - | + | - | + | - | + |     |
| PDGF-BB | - | - | + | + | - | - | + | + |     |
|         |   |   |   |   |   |   |   |   | 15' |

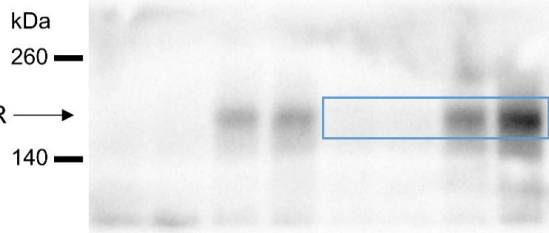

IP : LRP6

|         |   |   |   |   |   |   |   |   |     |
|---------|---|---|---|---|---|---|---|---|-----|
| SOST    | - | + | - | + | - | + | - | + |     |
| PDGF-BB | - | - | + | + | - | - | + | + |     |
|         |   |   |   |   |   |   |   |   | 15' |

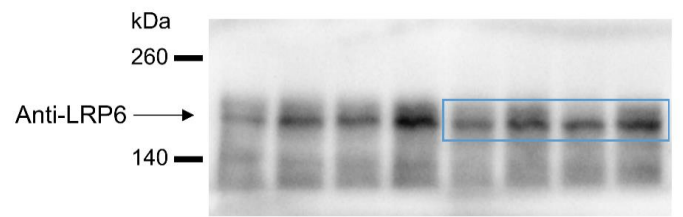

IP : LRP6

|         |   |   |   |   |   |   |   |   |     |
|---------|---|---|---|---|---|---|---|---|-----|
| SOST    | - | + | - | + | - | + | - | + |     |
| PDGF-BB | - | - | + | + | - | - | + | + |     |
|         |   |   |   |   |   |   |   |   | 15' |

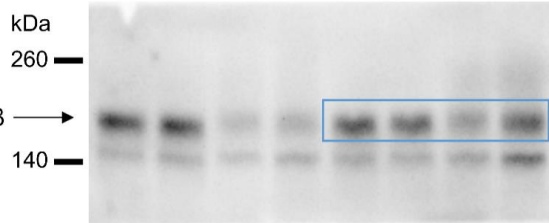

IP : LRP6

|         |   |   |   |   |   |   |   |   |     |
|---------|---|---|---|---|---|---|---|---|-----|
| SOST    | - | + | - | + | - | + | - | + |     |
| PDGF-BB | - | - | + | + | - | - | + | + |     |
|         |   |   |   |   |   |   |   |   | 15' |

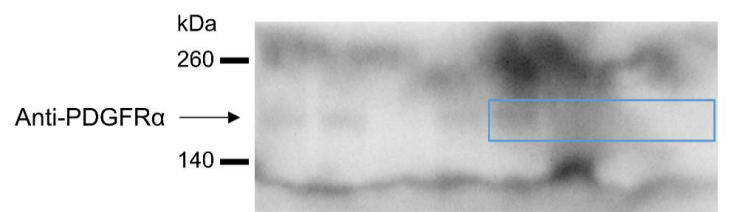

IP : LRP6

|         |   |   |   |   |   |   |   |   |     |
|---------|---|---|---|---|---|---|---|---|-----|
| SOST    | - | + | - | + | - | + | - | + |     |
| PDGF-BB | - | - | + | + | - | - | + | + |     |
|         |   |   |   |   |   |   |   |   | 15' |

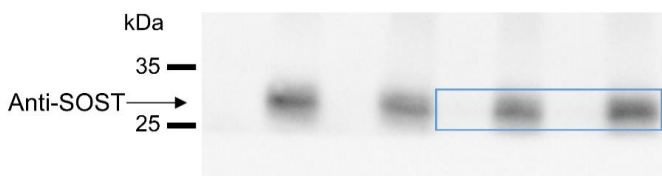

# Unedited blots for Figure 5G

SOST - + - +  
 PDGF-BB - - + + 15'

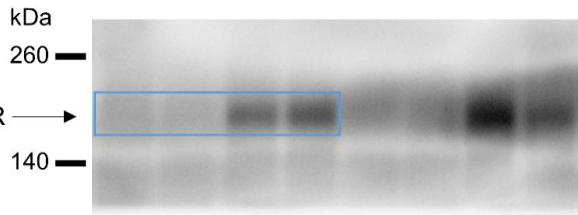

SOST - + - +  
 PDGF-BB - - + + 15'

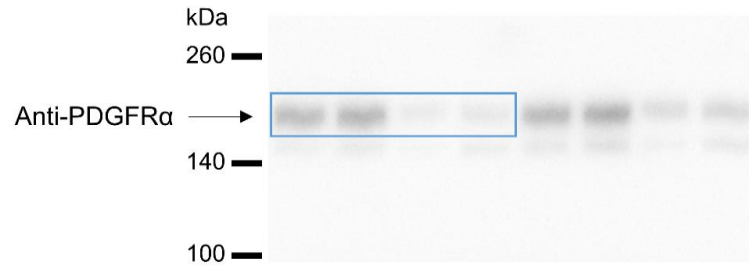

SOST - + - +  
 PDGF-BB - - + + 15'

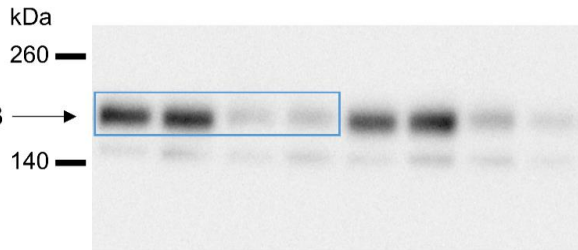

SOST - + - +  
 PDGF-BB - - + + 15'

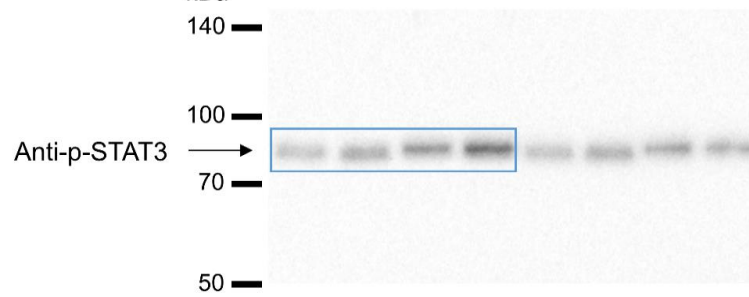

SOST - + - +  
 PDGF-BB - - + + 15'

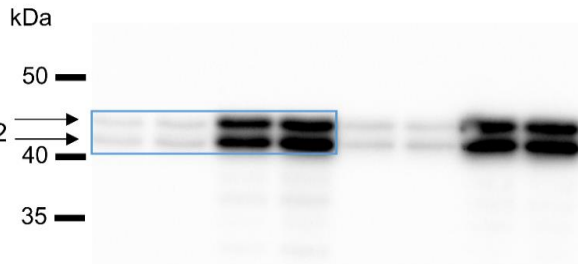

SOST - + - +  
 PDGF-BB - - + + 15'

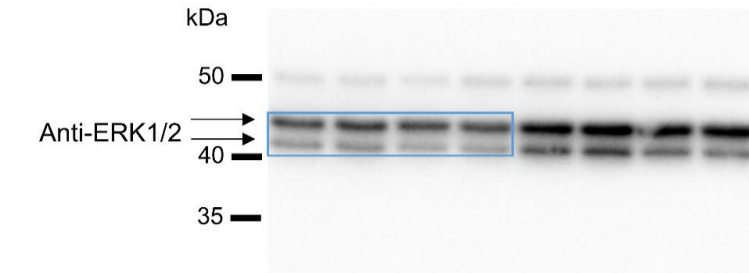

# Unedited blots for Figure 6C

|         |   |   |   |   |   |   |     |
|---------|---|---|---|---|---|---|-----|
| SOST    | - | - | + | - | - | + |     |
| Wnt1    | - | - | - | + | + | + |     |
| PDGF-BB | - | + | + | - | + | + | 15' |

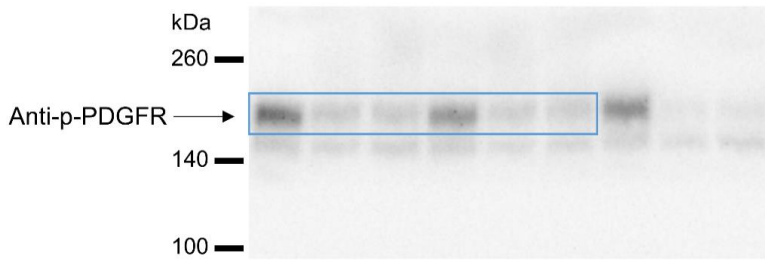

|         |   |   |   |   |   |   |     |
|---------|---|---|---|---|---|---|-----|
| SOST    | - | - | + | - | - | + |     |
| Wnt1    | - | - | - | + | + | + |     |
| PDGF-BB | - | + | + | - | + | + | 15' |

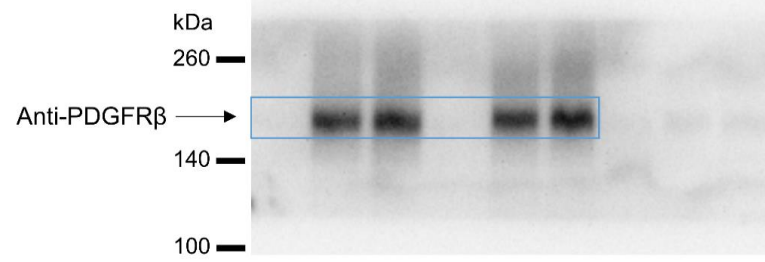

|         |   |   |   |   |   |   |     |
|---------|---|---|---|---|---|---|-----|
| SOST    | - | - | + | - | - | + |     |
| Wnt1    | - | - | - | + | + | + |     |
| PDGF-BB | - | + | + | - | + | + | 15' |

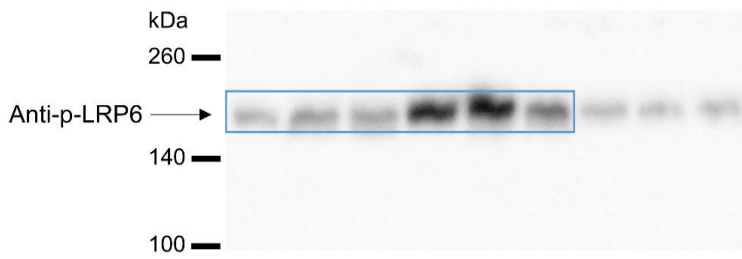

|         |   |   |   |   |   |   |     |
|---------|---|---|---|---|---|---|-----|
| SOST    | - | - | + | - | - | + |     |
| Wnt1    | - | - | - | + | + | + |     |
| PDGF-BB | - | + | + | - | + | + | 15' |

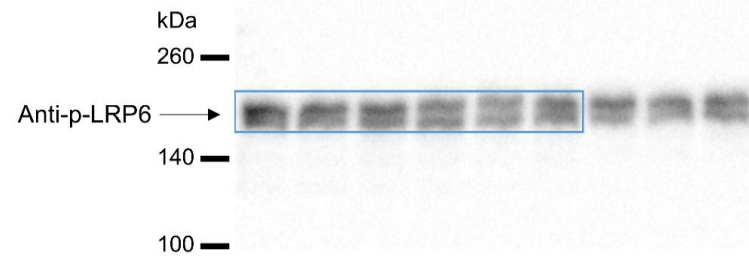

|         |   |   |   |   |   |   |     |
|---------|---|---|---|---|---|---|-----|
| SOST    | - | - | + | - | - | + |     |
| Wnt1    | - | - | - | + | + | + |     |
| PDGF-BB | - | + | + | - | + | + | 15' |

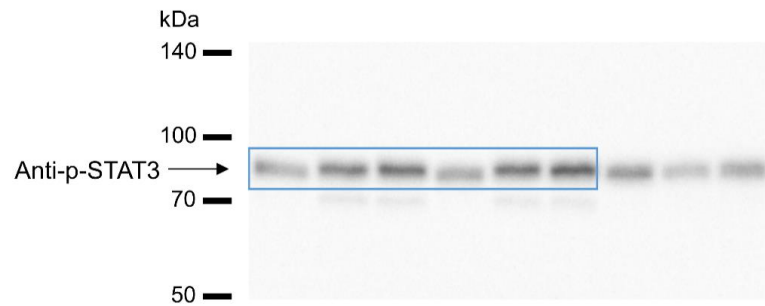

|         |   |   |   |   |   |   |     |
|---------|---|---|---|---|---|---|-----|
| SOST    | - | - | + | - | - | + |     |
| Wnt1    | - | - | - | + | + | + |     |
| PDGF-BB | - | + | + | - | + | + | 15' |

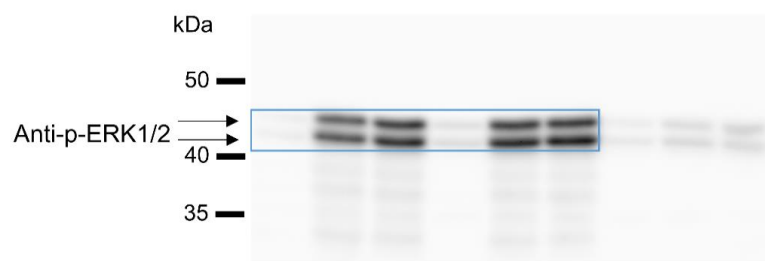

|         |   |   |   |   |   |   |     |
|---------|---|---|---|---|---|---|-----|
| SOST    | - | - | + | - | - | + |     |
| Wnt1    | - | - | - | + | + | + |     |
| PDGF-BB | - | + | + | - | + | + | 15' |

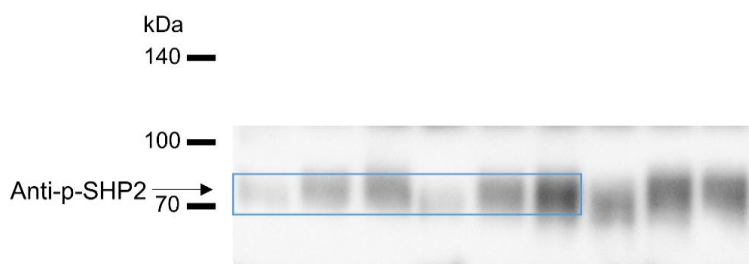

|         |   |   |   |   |   |   |     |
|---------|---|---|---|---|---|---|-----|
| SOST    | - | - | + | - | - | + |     |
| Wnt1    | - | - | - | + | + | + |     |
| PDGF-BB | - | + | + | - | + | + | 15' |

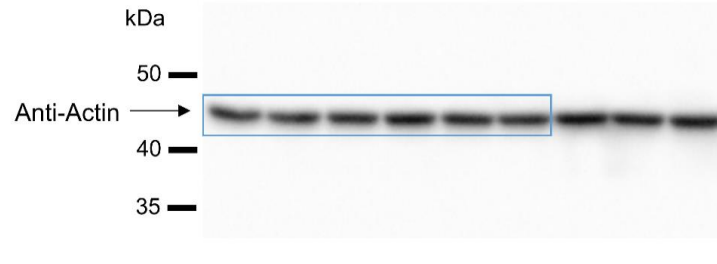

# Unedited blots for Figure 6F

|         |   |   |   |   |   |   |   |   |
|---------|---|---|---|---|---|---|---|---|
| DKK1    | - | + | - | + | - | + | - | + |
| PDGF-BB | - | - | + | + | - | - | + | + |

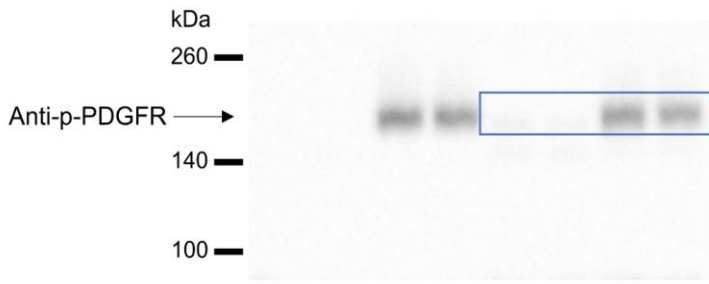

|         |   |   |   |   |   |   |   |   |
|---------|---|---|---|---|---|---|---|---|
| DKK1    | - | + | - | + | - | + | - | + |
| PDGF-BB | - | - | + | + | - | - | + | + |

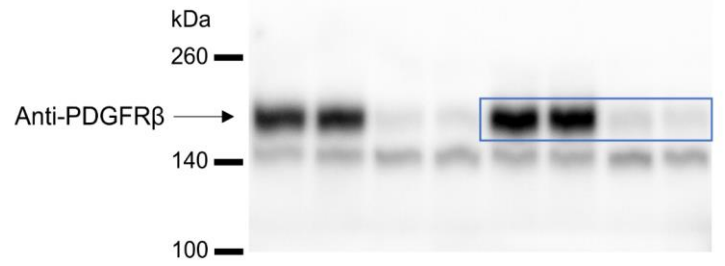

|         |   |   |   |   |   |   |   |   |
|---------|---|---|---|---|---|---|---|---|
| DKK1    | - | + | - | + | - | + | - | + |
| PDGF-BB | - | - | + | + | - | - | + | + |

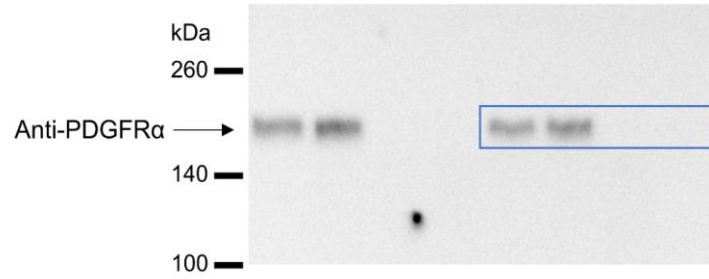

|         |   |   |   |   |   |   |   |   |
|---------|---|---|---|---|---|---|---|---|
| DKK1    | - | + | - | + | - | + | - | + |
| PDGF-BB | - | - | + | + | - | - | + | + |

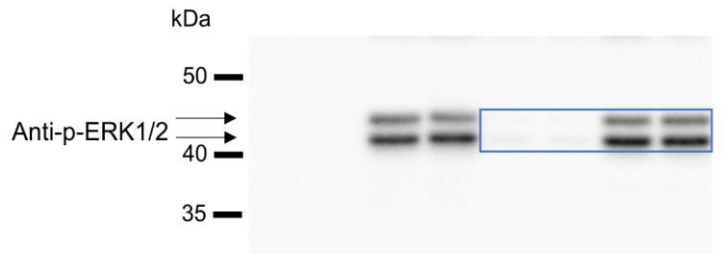

|         |   |   |   |   |   |   |   |   |
|---------|---|---|---|---|---|---|---|---|
| DKK1    | - | + | - | + | - | + | - | + |
| PDGF-BB | - | - | + | + | - | - | + | + |

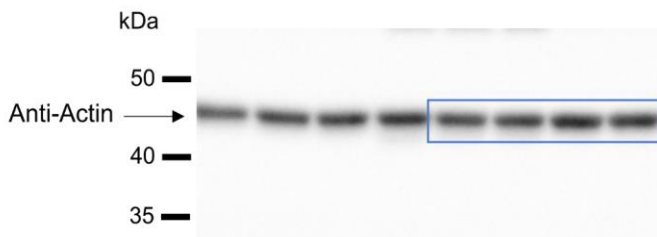

# Unedited blots for Figure 6G

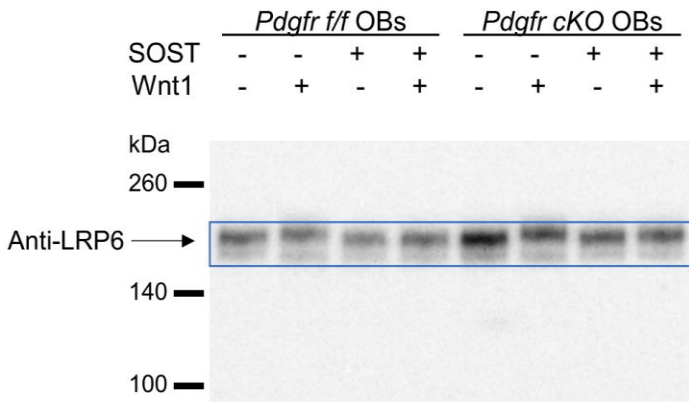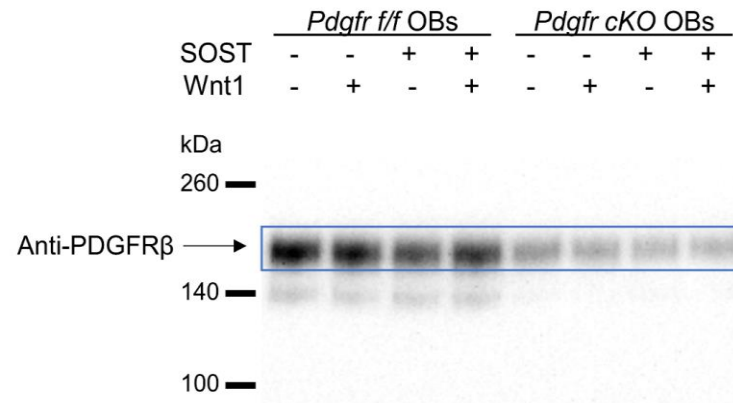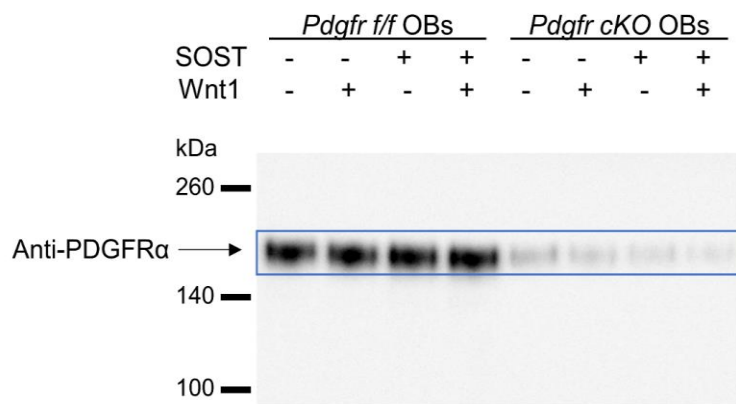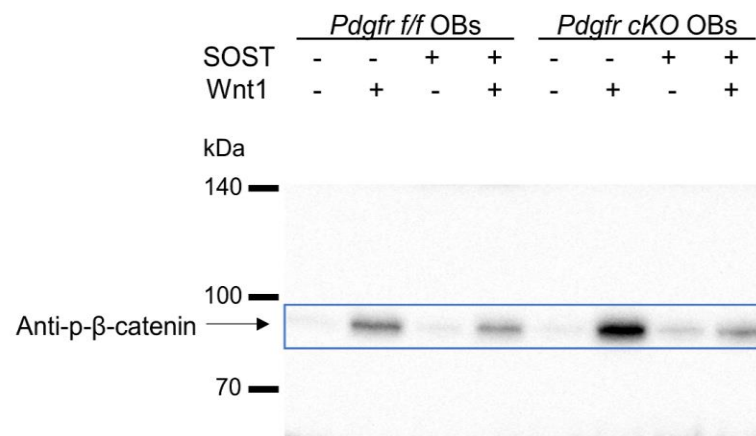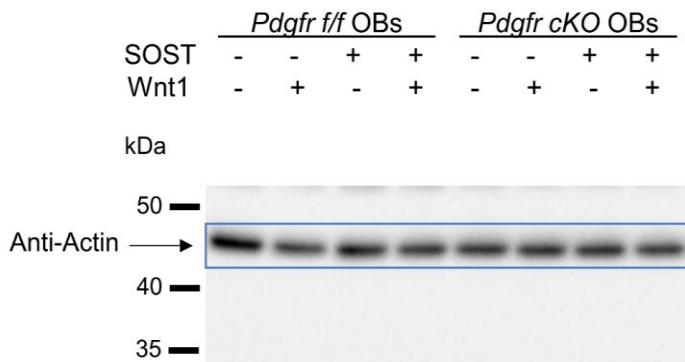

# Unedited blots for Supplemental Figure 2C

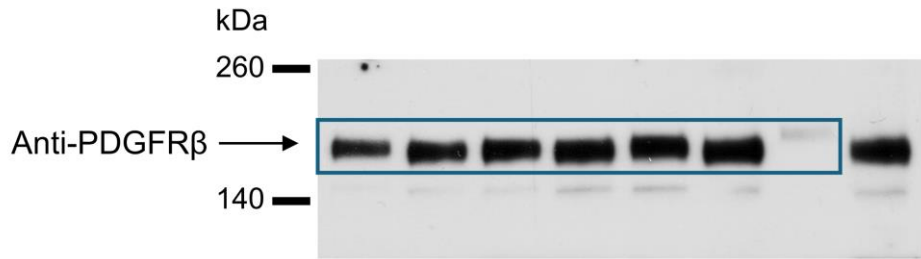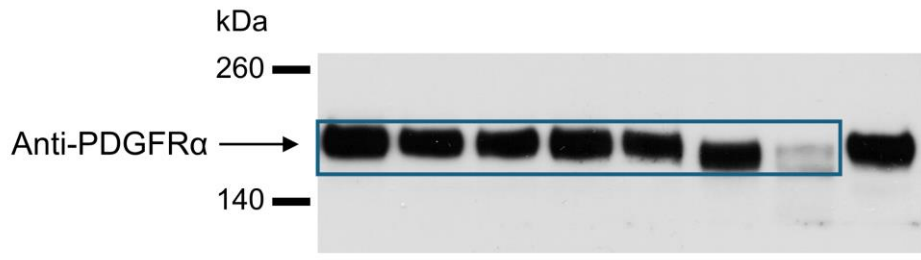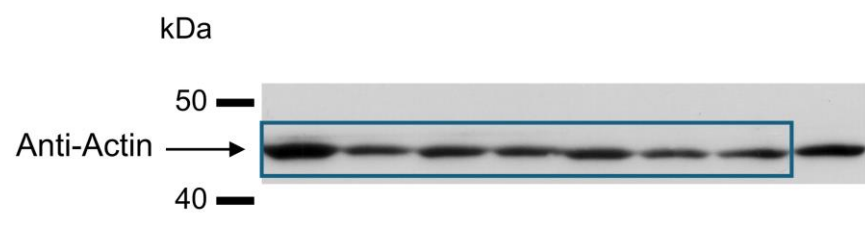

Supplement: sd2 [file 2]
